# Supplementary material for: Acute promyelocytic leukaemia: population-based study of epidemiology and outcome with ATRA and oral-ATO from 1991 to 2021
Source: PubMed Central journal article supplement (PMC9921648; doi:10.1186/s12885-023-10612-z), 2023-02-10

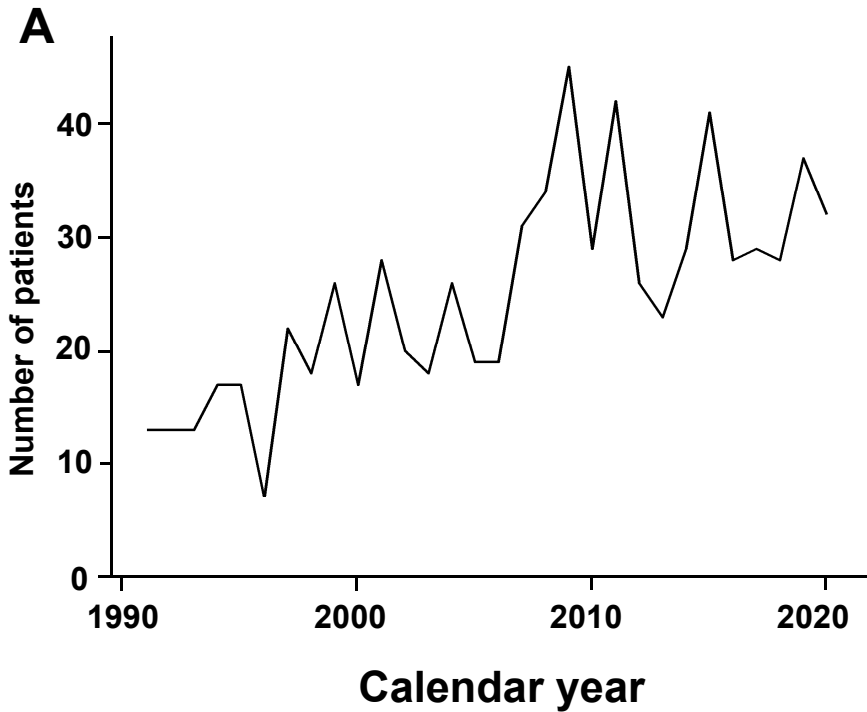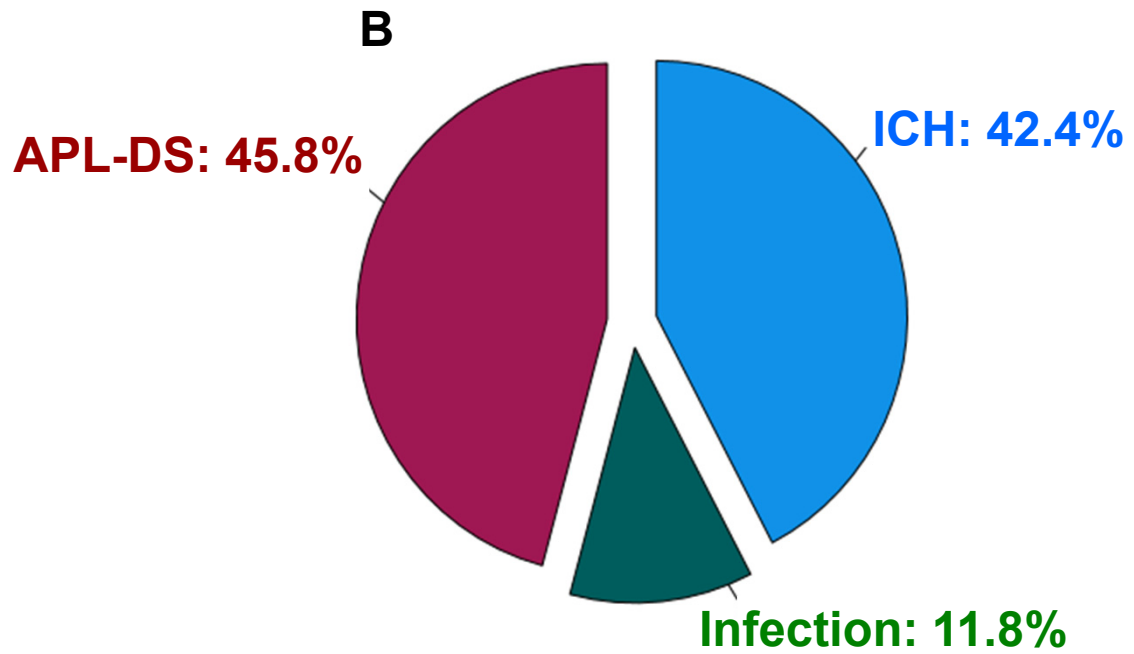

Supplement: 12885_2023_10612_MOESM3_ESM.pdf [file 12885_2023_10612_MOESM3_ESM.pdf]
