# Supplementary material for: Acute promyelocytic leukaemia: population-based study of epidemiology and outcome with ATRA and oral-ATO from 1991 to 2021
Source: PubMed Central journal article supplement (PMC9921648; doi:10.1186/s12885-023-10612-z), 2023-02-10
Supplement: 12885_2023_10612_MOESM4_ESM.pdf [file 12885_2023_10612_MOESM4_ESM.pdf]

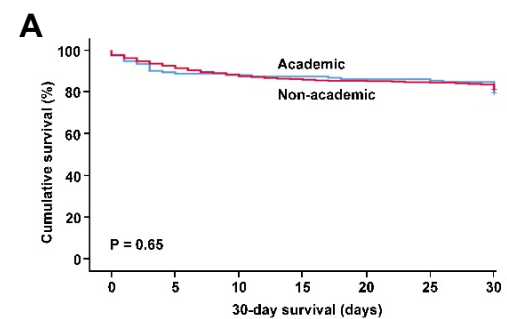

|              | Number at risk |     |     |     |     |     |     |  |
|--------------|----------------|-----|-----|-----|-----|-----|-----|--|
| Academic     | 151            | 135 | 133 | 132 | 130 | 130 | 128 |  |
| Non-academic | 600            | 555 | 530 | 517 | 512 | 508 | 501 |  |

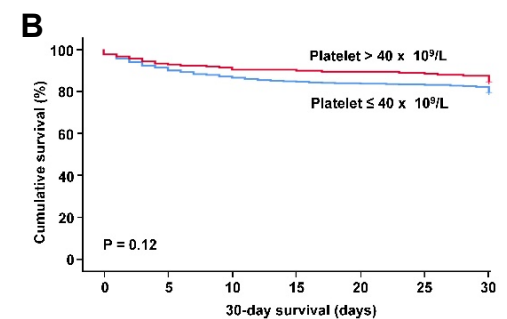

|               | Number at risk |     |     |     |     |     |     |  |
|---------------|----------------|-----|-----|-----|-----|-----|-----|--|
| Platelet > 40 | 216            | 193 | 189 | 187 | 185 | 184 | 181 |  |
| Platelet ≤ 40 | 519            | 482 | 460 | 448 | 443 | 440 | 434 |  |

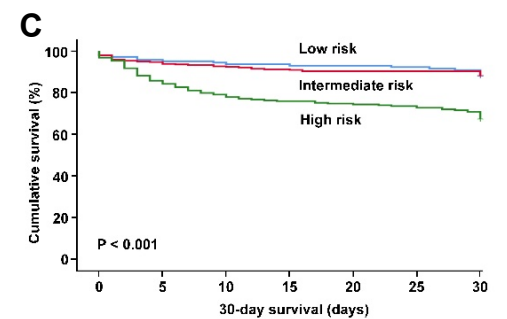

|              | Number at risk |     |     |     |     |     |     |  |
|--------------|----------------|-----|-----|-----|-----|-----|-----|--|
| Low          | 142            | 136 | 134 | 133 | 132 | 131 | 129 |  |
| Intermediate | 340            | 322 | 316 | 310 | 307 | 307 | 307 |  |
| High         | 253            | 217 | 200 | 192 | 189 | 186 | 179 |  |
