# Supplementary material for: Acute promyelocytic leukaemia: population-based study of epidemiology and outcome with ATRA and oral-ATO from 1991 to 2021
Source: PubMed Central journal article supplement (PMC9921648; doi:10.1186/s12885-023-10612-z), 2023-02-10
Supplement: 12885_2023_10612_MOESM7_ESM.pdf [file 12885_2023_10612_MOESM7_ESM.pdf]

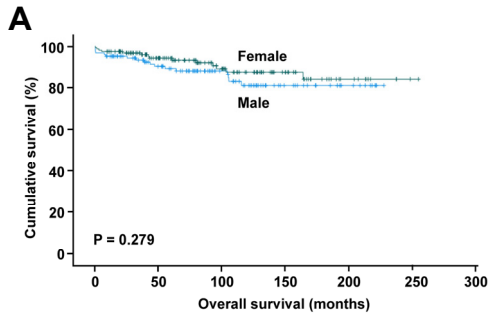

| Number at risk |     |     |    |    |    |   |
|----------------|-----|-----|----|----|----|---|
| Female         | 157 | 104 | 60 | 29 | 10 | 1 |
| Male           | 125 | 88  | 51 | 22 | 9  |   |

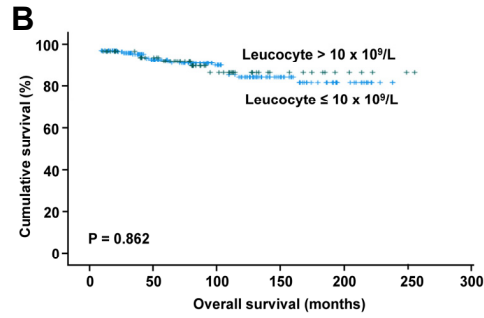

| Number at risk |     |     |    |    |    |   |
|----------------|-----|-----|----|----|----|---|
| Leucocyte >10  | 77  | 55  | 26 | 11 | 5  | 1 |
| Leucocyte ≤10  | 203 | 136 | 84 | 40 | 14 |   |

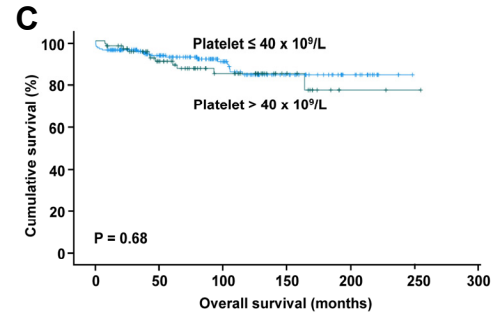

| Number at risk |     |     |    |    |    |   |
|----------------|-----|-----|----|----|----|---|
| Platelet ≤40   | 195 | 134 | 76 | 38 | 17 |   |
| Platelet >40   | 85  | 57  | 34 | 13 | 2  | 1 |

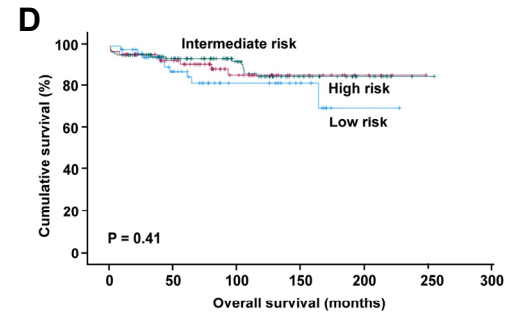

| Number at risk |     |     |    |    |    |   |
|----------------|-----|-----|----|----|----|---|
| Intermediate   | 144 | 100 | 66 | 32 | 14 | 1 |
| High           | 77  | 56  | 25 | 10 | 4  |   |
| Low            | 59  | 35  | 19 | 9  | 1  |   |

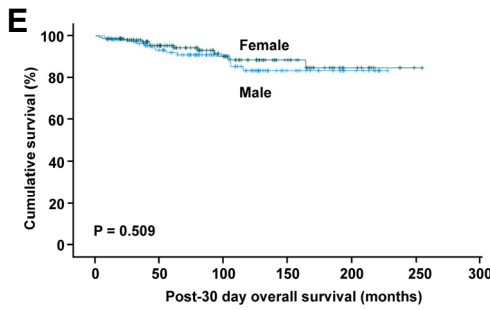

| Number at risk |     |     |    |    |    |   |
|----------------|-----|-----|----|----|----|---|
| Female         | 155 | 104 | 60 | 29 | 10 | 1 |
| Male           | 121 | 88  | 51 | 22 | 9  |   |

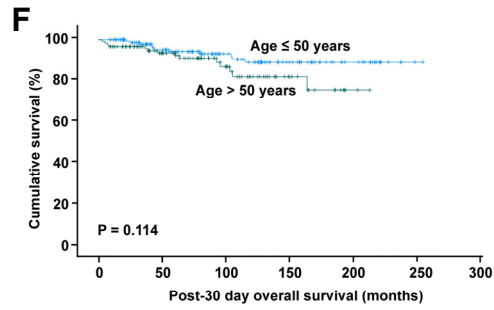

| Number at risk |     |     |    |    |    |   |
|----------------|-----|-----|----|----|----|---|
| Age ≤50        | 155 | 110 | 70 | 36 | 17 | 1 |
| Age >50        | 121 | 82  | 41 | 15 | 2  |   |

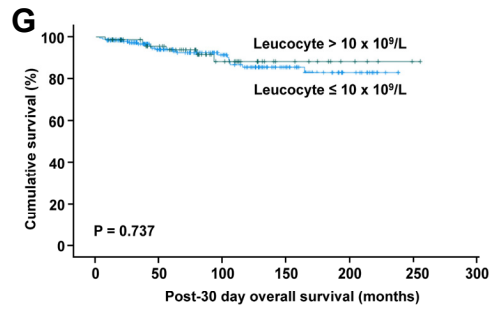

| Number at risk |     |     |    |    |    |   |
|----------------|-----|-----|----|----|----|---|
| Leucocyte ≤ 10 | 75  | 55  | 26 | 11 | 5  | 1 |
| Leucocyte >10  | 199 | 136 | 84 | 40 | 14 |   |

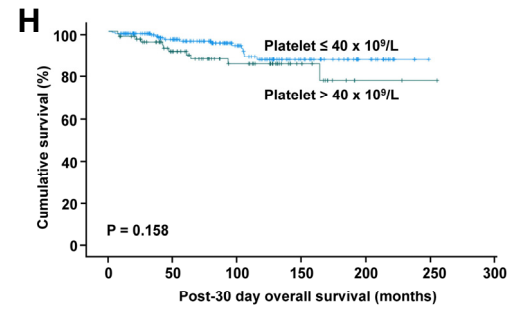

| Number at risk |     |     |    |    |    |   |
|----------------|-----|-----|----|----|----|---|
| Platelet ≤40   | 189 | 134 | 76 | 38 | 17 |   |
| Platelet >40   | 85  | 57  | 34 | 13 | 2  | 1 |

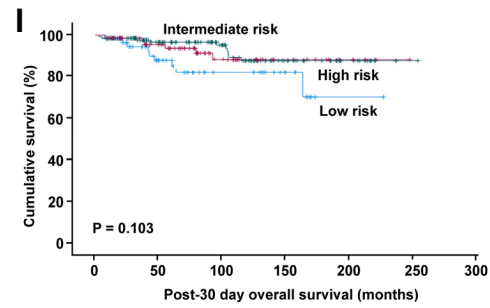

| Number at risk |     |     |    |    |    |   |
|----------------|-----|-----|----|----|----|---|
| Intermediate   | 140 | 100 | 66 | 32 | 14 | 1 |
| High           | 76  | 56  | 25 | 10 | 4  |   |
| Low            | 59  | 35  | 19 | 9  | 1  |   |

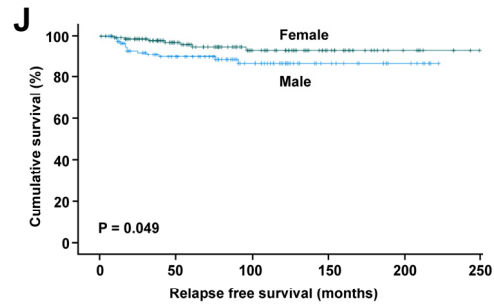

| Number at risk |     |    |    |    |   |
|----------------|-----|----|----|----|---|
| Female         | 155 | 97 | 51 | 25 | 8 |
| Male           | 121 | 80 | 44 | 18 | 8 |

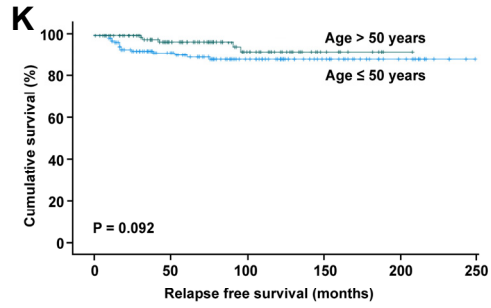

| Number at risk |     |     |    |    |    |
|----------------|-----|-----|----|----|----|
| Age >50        | 121 | 77  | 34 | 11 | 1  |
| Age ≤50        | 155 | 100 | 61 | 32 | 15 |

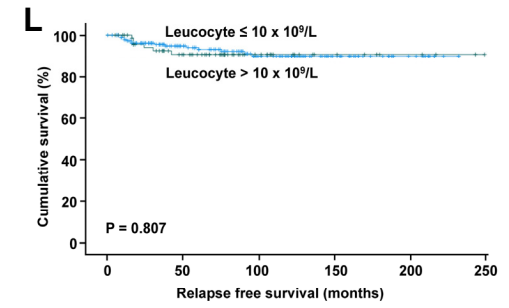

| Number at risk |     |     |    |    |    |
|----------------|-----|-----|----|----|----|
| Leucocyte ≤ 10 | 199 | 127 | 73 | 35 | 12 |
| Leucocyte >10  | 75  | 49  | 21 | 8  | 4  |

**M**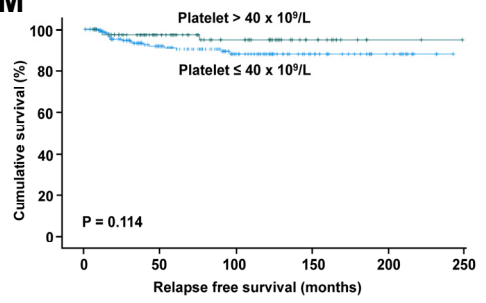

|              | Number at risk |     |     |     |     |
|--------------|----------------|-----|-----|-----|-----|
|              | 0              | 50  | 100 | 150 | 200 |
| Platelet >40 | 85             | 55  | 33  | 13  | 2   |
| Platelet ≤40 | 189            | 121 | 61  | 30  | 14  |

**N**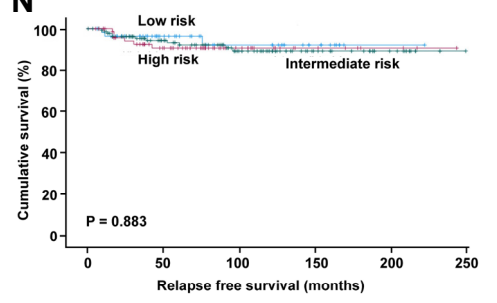

|              | Number at risk |    |     |     |     |
|--------------|----------------|----|-----|-----|-----|
|              | 0              | 50 | 100 | 150 | 200 |
| Low          | 59             | 33 | 18  | 9   | 1   |
| Intermediate | 140            | 93 | 56  | 27  | 12  |
| High         | 75             | 50 | 20  | 7   | 3   |
