# Supplementary material for: Acute promyelocytic leukaemia: population-based study of epidemiology and outcome with ATRA and oral-ATO from 1991 to 2021
Source: PubMed Central journal article supplement (PMC9921648; doi:10.1186/s12885-023-10612-z), 2023-02-10
Supplement: 12885_2023_10612_MOESM8_ESM.pdf [file 12885_2023_10612_MOESM8_ESM.pdf]

**Supplemental file 8. Second malignancies in 21 patients with acute promyelocytic leukaemia (APL)**

| Sex | Acute promyelocytic leukaemia treatment                                                            |                                                                                       | Second cancer        |                                        |                 |
|-----|----------------------------------------------------------------------------------------------------|---------------------------------------------------------------------------------------|----------------------|----------------------------------------|-----------------|
|     | First line                                                                                         | Second line and beyond                                                                | Age at onset (years) | Histology                              | Years after APL |
| F   | Induction: ATRA-daunorubicin<br>Consolidation: daunorubicin+AraC<br>Maintenance: ATRA-6MP-oral MTX | No                                                                                    | 52                   | Endometrial cancer                     | 24              |
| M   | Induction: ATRA-daunorubicin<br>Consolidation: daunorubicin+AraC<br>Maintenance: ATRA-6MP-oral MTX | Re-induction: ATRA-idarubicin<br>Autologous HSCT                                      | 39                   | Oesophageal carcinoma                  | 16              |
| F   | Induction: ATRA-daunorubicin<br>Consolidation: daunorubicin+AraC<br>Maintenance: ATRA-6MP-oral MTX | No                                                                                    | 44                   | Breast cancer                          | 20              |
| F   | Induction: ATRA-daunorubicin<br>Consolidation: daunorubicin+AraC<br>Maintenance: ATRA-6MP-oral MTX | Re-induction: AAA + idarubicin<br>Consolidation: AAA + idarubicin<br>Maintenance: AAA | 37                   | Thyroid papillary carcinoma            | 15              |
| F   | Induction: ATRA-daunorubicin<br>Consolidation: daunorubicin+AraC<br>Maintenance: ATRA-6MP-oral MTX | Re-induction: AAA + idarubicin<br>Consolidation: AAA + idarubicin<br>Maintenance: AAA | 45                   | Endometrial carcinoma                  | 19              |
| F   | Induction: ATRA-daunorubicin<br>Consolidation: daunorubicin+AraC<br>Maintenance: ATRA-6MP-oral MTX | No                                                                                    | 50                   | Myelodysplastic syndrome               | 6               |
| F   | Induction: ATRA-daunorubicin<br>Consolidation: daunorubicin+AraC<br>Maintenance: ATRA-6MP-oral MTX | Re-induction: AAA + idarubicin<br>Consolidation: AAA + idarubicin<br>Maintenance: AAA | 68                   | Breast cancer                          | 17              |
| F   | Induction: ATRA-daunorubicin<br>Consolidation: daunorubicin+AraC<br>Maintenance: AAA               | No                                                                                    | 44                   | Nasopharyngeal cancer                  | 1               |
| M   | Induction: ATRA-daunorubicin<br>Consolidation: daunorubicin+AraC<br>Maintenance: AAA               | Re-induction: AAA + idarubicin<br>Consolidation: AAA + idarubicin<br>Maintenance: AAA | 45                   | Parotid cancer                         | 1               |
| F   | Induction: ATRA-daunorubicin<br>Consolidation: daunorubicin+AraC<br>Maintenance: AAA               | No                                                                                    | 67                   | Transitional cell carcinoma of ureters | 12              |

|   |                                                                                                    |                                                                                                   |    |                          |    |
|---|----------------------------------------------------------------------------------------------------|---------------------------------------------------------------------------------------------------|----|--------------------------|----|
| F | Induction: ATRA-daunorubicin<br>Consolidation: daunorubicin+AraC<br>Maintenance: ATRA-6MP-oral MTX | No                                                                                                | 58 | Lung cancer              | 3  |
| F | Induction: ATRA-daunorubicin<br>Consolidation: daunorubicin+AraC<br>Maintenance: ATRA-6MP-oral MTX | No                                                                                                | 54 | Breast cancer            | 13 |
| F | Induction: ATRA-daunorubicin<br>Consolidation: daunorubicin+AraC<br>Maintenance: AAA               | No                                                                                                | 47 | Colorectal cancer        | 1  |
| M | Induction: ATRA-daunorubicin<br>Consolidation: daunorubicin+AraC<br>Maintenance: ATRA-6MP-oral MTX | First re-inductio: AAA + idarubicin<br>Second re-induction: AAA + mitoxantrone<br>Autologous HSCT | 59 | Myelodysplastic syndrome | 8  |
| F | Induction: ATRA-daunorubicin<br>Consolidation: daunorubicin+AraC<br>Maintenance: AAA               | No                                                                                                | 57 | Breast cancer            | 9  |
| F | Induction: ATRA-daunorubicin<br>Consolidation: daunorubicin+AraC<br>Maintenance: ATRA-6MP-oral MTX | Re-induction: AAA + idarubicin<br>Consolidation: AAA + idarubicin<br>Maintenance: AAA             | 44 | Colorectal cancer        | 2  |
| M | Induction: ATRA-daunorubicin<br>Consolidation: daunorubicin+AraC<br>Maintenance: AAA               | No                                                                                                | 57 | Renal cell carcinoma     | 5  |
| M | Induction: ATRA-daunorubicin<br>Consolidation: daunorubicin+AraC<br>Maintenance: ATRA-6MP-oral MTX | No                                                                                                | 88 | Cholangiocarcinoma       | 20 |
| M | Induction: ATRA-daunorubicin<br>Consolidation: daunorubicin+AraC<br>Maintenance: ATRA-6MP-oral MTX | No                                                                                                | 70 | Carcinoma of tongue      | 3  |
| M | Induction: ATRA-daunorubicin<br>Consolidation: daunorubicin+AraC<br>Maintenance: AAA               | No                                                                                                | 77 | Colorectal carcinoma     | 4  |
| F | Induction: ATRA-daunorubicin<br>Consolidation: daunorubicin+AraC<br>Maintenance: AAA               | No                                                                                                | 62 | Breast cancer            | 2  |

M: male; F: female; ATRA: all-trans retinoic acid; Ara-C: cytarabine; 6MP: 6-mercaptopurine; MTX: methotrexate; AAA: oral arsenic trioxide, ATRA, ascorbic acid; HSCT: haematopoietic stem cell transplantation
