# Supplementary material for: Acute promyelocytic leukaemia: population-based study of epidemiology and outcome with ATRA and oral-ATO from 1991 to 2021
Source: Springer Nature journal article supplement (doi:10.1186/s12885-023-10612-z), 2023-02-10
Supplement: MOESM1 [file 24015632]

# Supplemental file 1. Treatment regimens for acute promyelocytic leukemia in Hong Kong.

1991-2021

Age 18-69 without cardiac comorbidities

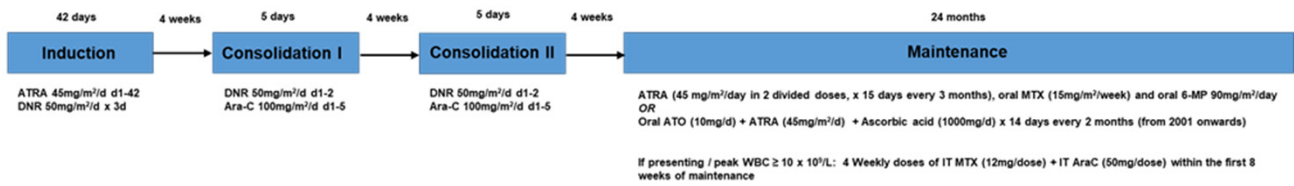

1991-2021

Age ≥ 70 or with severe cardiac co-morbidities or ECOG ≥ 2

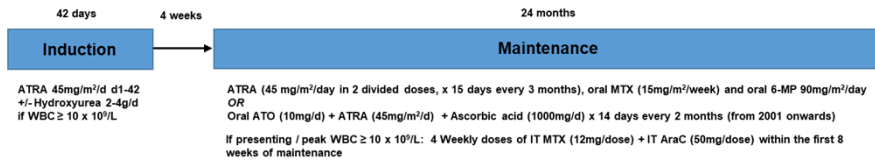

2013-2017 – APL001 study

Age 18-69 without cardiac comorbidities

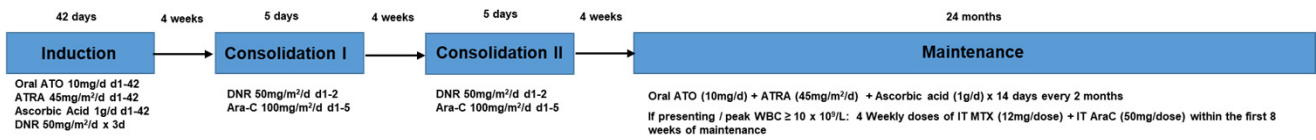

2013-2017 APL001 study

Age ≥ 70 or with severe cardiac comorbidities or ECOG ≥ 2

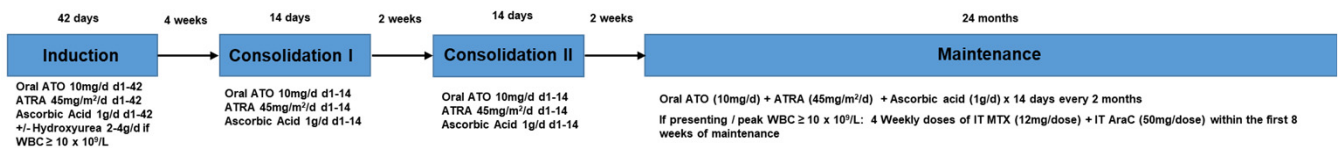

APL002 study 2018-2021

Age ≥ 18 and presenting WBC < 10 × 10<sup>9</sup>/L or Age ≥ 65 regardless of WBC

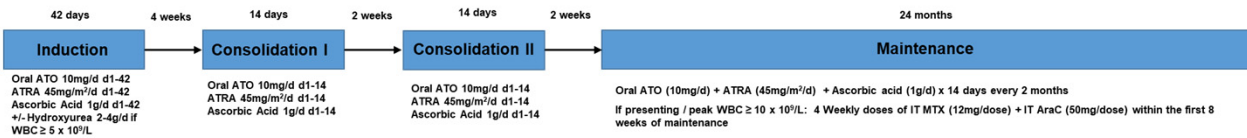

Age ≥ 18 and presenting WBC ≥ 10 × 10<sup>9</sup>/L without cardiac comorbidities

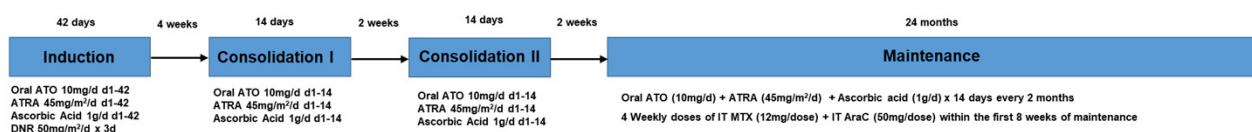

2007-2020 ICC APL Study 01

Age < 18 years

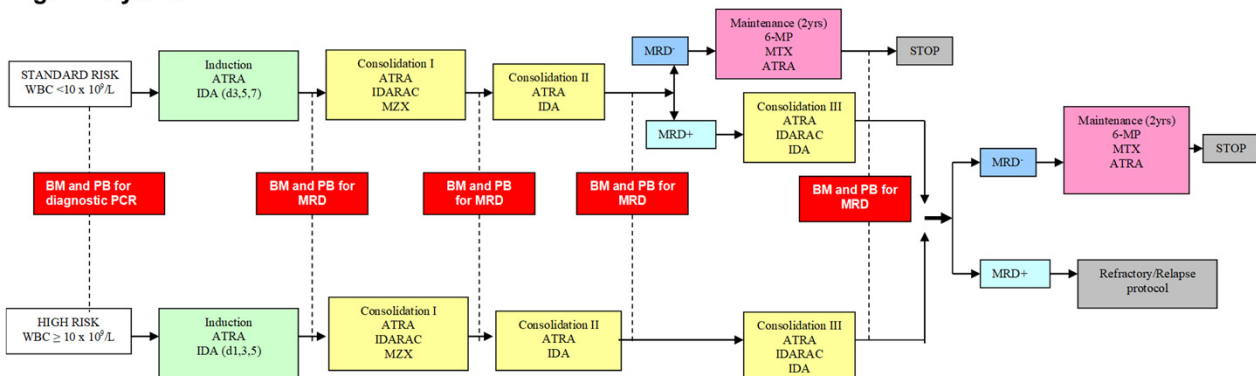

**ATRA:** all-*trans*-retinoic acid; **DNR:** daunorubicin; **AraC:** cytarabine; **ATO:** arsenic trioxide; **MTX:** methotrexate; **6-MP:** 6-mercaptopurine; **IT:** intrathecal; **WBC:** white blood cell; **IDA:** idarubicin; **IDARAC:** intermediate dose cytarabine; **MZX:** mitoxantrone; **BM:** bone marrow; **PB:** peripheral blood; **MRD:** measurable residual disease; **d:** day/days; **x:** for; **+**: plus/positive
