# Supplementary material for: Acute promyelocytic leukaemia: population-based study of epidemiology and outcome with ATRA and oral-ATO from 1991 to 2021
Source: Springer Nature journal article supplement (doi:10.1186/s12885-023-10612-z), 2023-02-10
Supplement: MOESM5 [file 24015632]

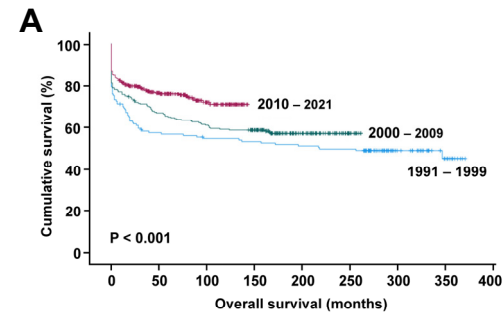

|             | Number at risk |     |     |     |    |    |    |    |
|-------------|----------------|-----|-----|-----|----|----|----|----|
| 1991 – 1999 | 146            | 82  | 77  | 75  | 72 | 70 | 29 | 10 |
| 2000 – 2009 | 257            | 170 | 155 | 135 | 61 | 9  |    |    |
| 2010 – 2021 | 348            | 181 | 75  |     |    |    |    |    |

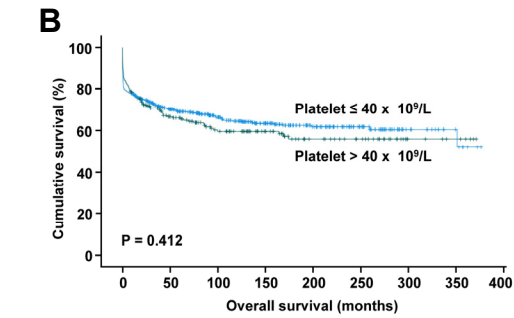

|                   | Number at risk |     |     |     |    |    |    |   |
|-------------------|----------------|-----|-----|-----|----|----|----|---|
| Platelet $\le 40$ | 519            | 305 | 219 | 151 | 94 | 55 | 18 | 7 |
| Platelet $> 40$   | 216            | 121 | 84  | 55  | 34 | 26 | 8  | 5 |

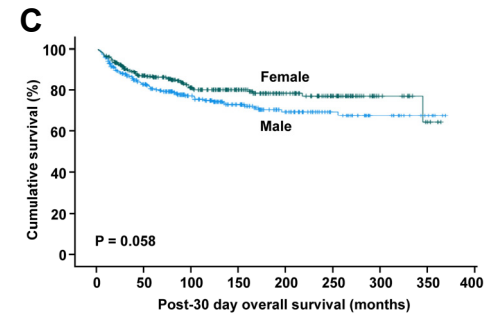

|        | Number at risk |     |     |     |    |    |    |   |
|--------|----------------|-----|-----|-----|----|----|----|---|
| Female | 328            | 231 | 162 | 108 | 70 | 43 | 13 | 4 |
| Male   | 279            | 200 | 144 | 101 | 62 | 36 | 16 | 6 |

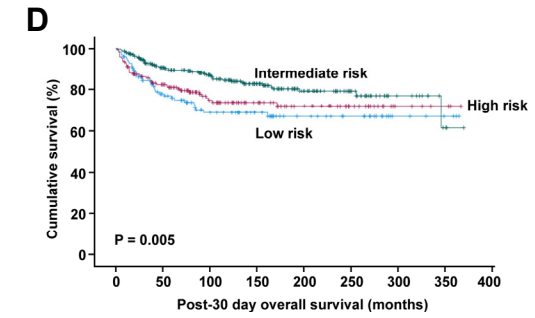

|              | Number at risk |     |     |     |    |    |    |   |
|--------------|----------------|-----|-----|-----|----|----|----|---|
| Intermediate | 300            | 224 | 172 | 116 | 67 | 37 | 12 | 3 |
| High         | 170            | 121 | 72  | 49  | 35 | 19 | 6  | 3 |
| Low          | 126            | 78  | 54  | 38  | 24 | 18 | 6  | 3 |

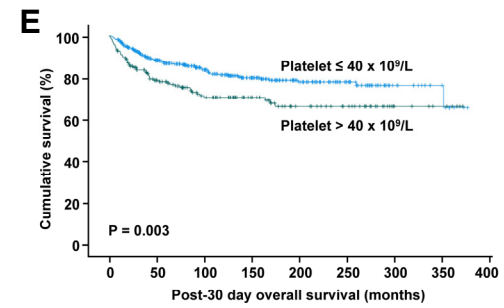

|                   | Number at risk |     |     |     |    |    |    |   |
|-------------------|----------------|-----|-----|-----|----|----|----|---|
| Platelet $\le 40$ | 412            | 304 | 219 | 151 | 94 | 55 | 18 | 7 |
| Platelet $> 40$   | 183            | 121 | 84  | 55  | 34 | 26 | 18 | 5 |

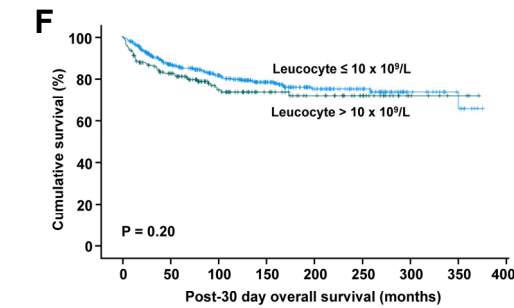

|                    | Number at risk |     |     |     |    |    |    |   |
|--------------------|----------------|-----|-----|-----|----|----|----|---|
| Leucocyte $\le 10$ | 424            | 304 | 228 | 155 | 92 | 58 | 19 | 9 |
| Leucocyte $> 10$   | 170            | 120 | 74  | 50  | 36 | 23 | 7  | 3 |

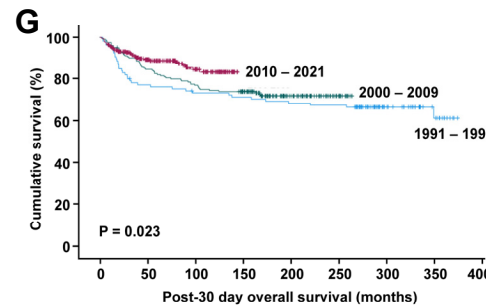

|             | Number at risk |     |     |     |    |    |    |    |
|-------------|----------------|-----|-----|-----|----|----|----|----|
| 1991 – 1999 | 297            | 182 | 80  |     |    |    |    |    |
| 2000 – 2009 | 203            | 170 | 155 | 138 | 63 | 16 |    |    |
| 2010 – 2021 | 107            | 81  | 76  | 74  | 71 | 70 | 31 | 13 |

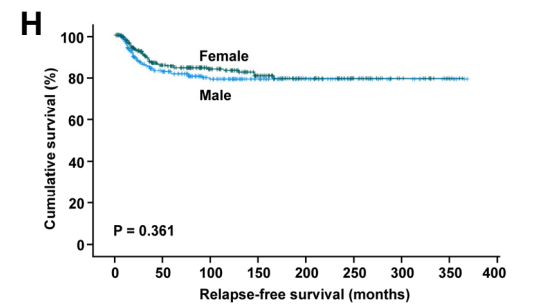

|        | Number at risk |     |     |    |    |    |    |   |
|--------|----------------|-----|-----|----|----|----|----|---|
| Female | 326            | 198 | 131 | 82 | 47 | 28 | 13 | 3 |
| Male   | 279            | 166 | 116 | 78 | 49 | 26 | 15 | 6 |

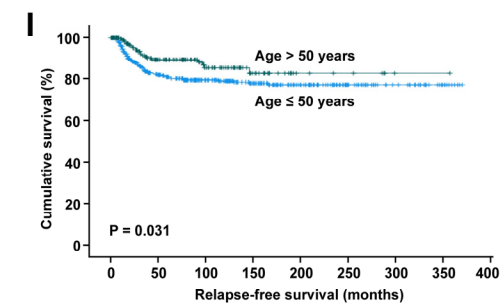

|              | Number at risk |     |     |     |    |    |    |   |
|--------------|----------------|-----|-----|-----|----|----|----|---|
| Age $> 50$   | 205            | 114 | 60  | 26  | 8  | 6  | 1  | 1 |
| Age $\le 50$ | 402            | 250 | 185 | 134 | 88 | 48 | 27 | 8 |

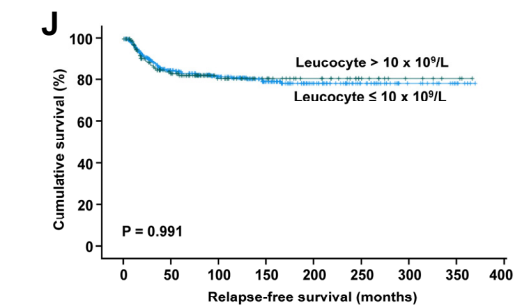

|                    | Number at risk |     |     |     |    |    |    |   |
|--------------------|----------------|-----|-----|-----|----|----|----|---|
| Leucocyte $> 10$   | 170            | 97  | 55  | 35  | 25 | 12 | 6  | 3 |
| Leucocyte $\le 10$ | 424            | 258 | 181 | 118 | 65 | 37 | 17 | 5 |

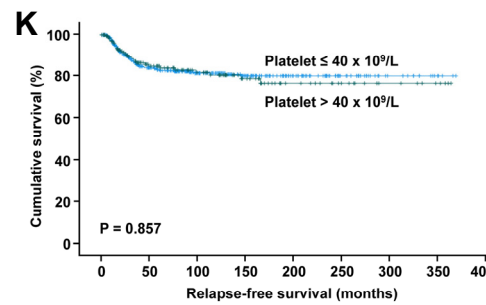

|                   | Number at risk |     |     |     |    |    |    |   |
|-------------------|----------------|-----|-----|-----|----|----|----|---|
| Platelet $\le 40$ | 412            | 254 | 167 | 112 | 68 | 35 | 15 | 4 |
| Platelet $> 40$   | 183            | 102 | 70  | 42  | 22 | 14 | 8  | 4 |

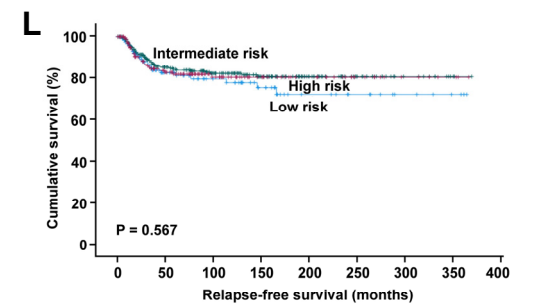

|              | Number at risk |     |     |    |    |    |    |   |
|--------------|----------------|-----|-----|----|----|----|----|---|
| Intermediate | 300            | 193 | 139 | 91 | 51 | 26 | 11 | 2 |
| High         | 170            | 98  | 54  | 34 | 24 | 12 | 6  | 3 |
| Low          | 125            | 65  | 44  | 29 | 15 | 11 | 6  | 3 |
