# Supplementary material for: Acute promyelocytic leukaemia: population-based study of epidemiology and outcome with ATRA and oral-ATO from 1991 to 2021
Source: Springer Nature journal article supplement (doi:10.1186/s12885-023-10612-z), 2023-02-10

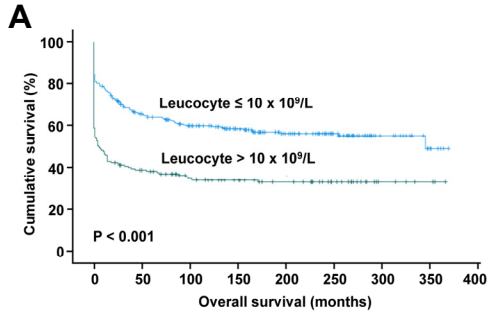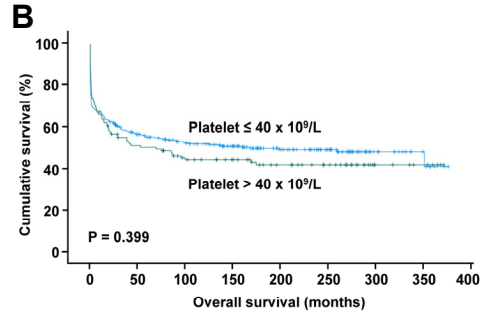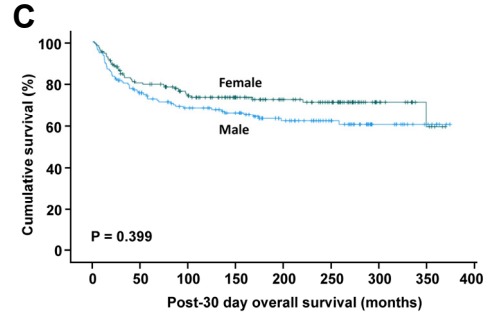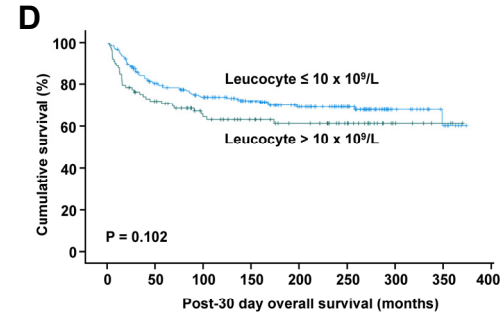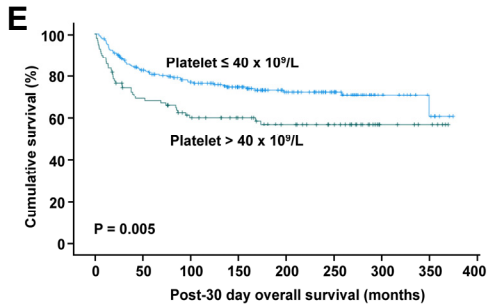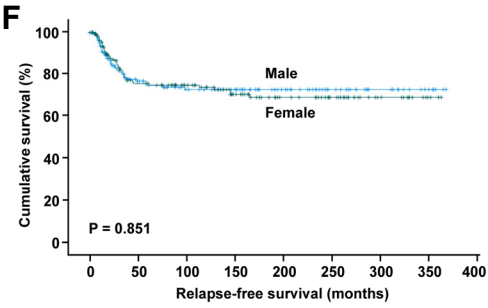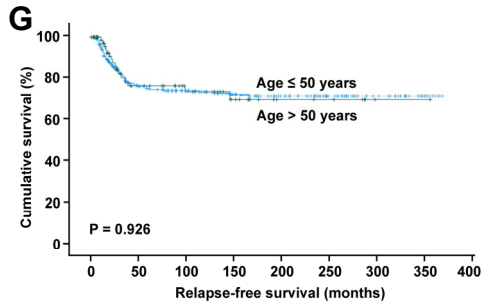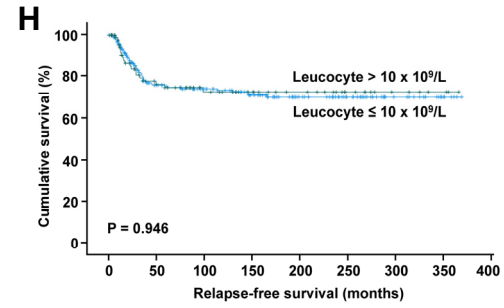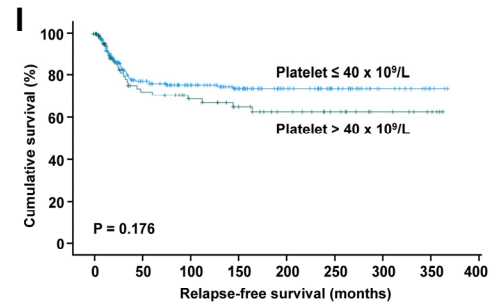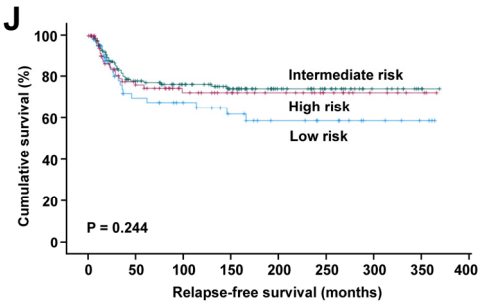

Supplement: MOESM6 [file 24015632]
