# Supplementary material for: Acute promyelocytic leukaemia: population-based study of epidemiology and outcome with ATRA and oral-ATO from 1991 to 2021
Source: BMC Cancer. 2023 Feb 10;23:141. doi: 10.1186/s12885-023-10612-z (PMC9921648; doi:10.1186/s12885-023-10612-z)
Supplement: Supplementary file 9 — Supplementary Material 9 [file 12885_2023_10612_MOESM9_ESM.pdf]

**Supplemental file 9. Standardized incidence ratio of second cancers and incidence rate ratio of second cancers in patients with acute promyelocytic leukaemia.**

|                                         | No. of APL | No. with 2° cancers | Expected No. of APL | SIR of 2° cancers (95% C.I.) | IRR (95% C.I.) <sup>A</sup> |
|-----------------------------------------|------------|---------------------|---------------------|------------------------------|-----------------------------|
| <b>Total</b>                            | 678        | 21                  | 578.08              | 3.63 (2.32, 5.59)            |                             |
| <b>Age (years)*</b>                     |            |                     |                     |                              |                             |
| <18                                     | 60         | 0                   | 97.94               | 0.00 (0.00, 4.70)            | Reference                   |
| 18–39                                   | 217        | 5                   | 222.15              | 2.25 (0.83, 5.46)            | undefined                   |
| 40–59                                   | 262        | 12                  | 217.07              | 5.53 (3.02, 9.69)            | undefined                   |
| 60–79                                   | 122        | 4                   | 101.83              | 3.93 (1.27, 10.33)           | undefined                   |
| ≥80                                     | 17         | 0                   | 10.62               | 0.00 (0.00, 32.99)           | undefined                   |
| <b>Sex</b>                              |            |                     |                     |                              |                             |
| Male                                    | 330        | 6                   | 319.54              | 1.88 (0.77, 4.24)            | Reference                   |
| Female                                  | 348        | 15                  | 330.07              | 4.54 (2.66, 7.55)            | 2.42 (0.94, 6.24)           |
| <b>Period</b>                           |            |                     |                     |                              |                             |
| 1991– 1999                              | 146        | 8                   | 134.64              | 5.94 (2.79, 11.75)           | Reference                   |
| 2000–2009                               | 257        | 12                  | 230.17              | 5.21 (2.85, 9.16)            | 0.88 (0.36, 2.15)           |
| 2010–2018 <sup>B</sup>                  | 275        | 1                   | 206.26              | 0.48 (0.03, 3.09)            | 0.08 (0.01, 0.65)           |
| <b>Exposure to oral-ATO at any time</b> |            |                     |                     |                              |                             |
| No                                      | 369        | 8                   | 369.39              | 2.17 (1.01, 4.39)            | Reference                   |
| Yes                                     | 309        | 13                  | 280.22              | 4.64 (2.60, 7.99)            | 2.14 (0.89, 5.17)           |
| <b>Time of exposure to oral-ATO</b>     |            |                     |                     |                              |                             |
| Never                                   | 369        | 8                   | 369.39              | 2.17 (1.01, 4.39)            | Reference                   |
| First-line                              | 212        | 7                   | 188.29              | 3.72 (1.64, 7.82)            | 1.72 (0.62, 4.73)           |
| Second-line only                        | 78         | 5                   | 75.19               | 6.65 (2.47, 15.49)           | 3.07 (1.00, 9.39)           |

APL: acute promyelocytic leukaemia; ATO: arsenic trioxide; No.: number; 2°: second; C.I.: confidence intervals; SIR: standardized incidence ratio; IRR: incidence rate ratio; A: values labelled as undefined, owing to the fact that IRR cannot be defined in different subgroups of age due to the small sample size; B: The last year where a second primary cancer occurred was in 2018. Comparison against the standard population was therefore until 2018. 2019–2021 was not included for second cancer comparison as the follow-up time for patients was too short to conclude if the incidence of second cancers was increased or decreased
