# Supplementary material for: Acute promyelocytic leukaemia: population-based study of epidemiology and outcome with ATRA and oral-ATO from 1991 to 2021
Source: BMC Cancer. 2023 Feb 10;23:141. doi: 10.1186/s12885-023-10612-z (PMC9921648; doi:10.1186/s12885-023-10612-z)
Supplement: Supplementary file 10 — Supplementary Material 10 [file 12885_2023_10612_MOESM10_ESM.pdf]

**Supplemental file 10. Incidence rate ratio of second cancers in acute promyelocytic leukaemia compared to cancer incidence in the general population.**

|                                     | No. | No. with 2 <sup>o</sup> cancer | No. of cancers in population <sup>A</sup> | Population <sup>A</sup> | IR of cancer (95% C.I.) <sup>B</sup> | P-value <sup>C</sup> | Cancer, APL > population | IRR (APL vs population) (95% C.I.) |
|-------------------------------------|-----|--------------------------------|-------------------------------------------|-------------------------|--------------------------------------|----------------------|--------------------------|------------------------------------|
| <b>Total</b>                        | 678 | 21                             | 665,894                                   | 181,374,978             | 254 (253, 255)                       | < 0.001              | Yes                      | 14.3 (9.3, 22.0)                   |
| <b>Age (years)</b>                  |     |                                |                                           |                         |                                      |                      |                          |                                    |
| <18                                 | 60  | 0                              | 4,990                                     | 58,419,166              | 14.6 (14.3, 14.9)                    | 0.50                 | No                       | undefined <sup>D</sup>             |
| 18–39                               | 217 | 5                              | 41,083                                    | 64,307,835              | 56.6 (56.1, 57.2)                    | < 0.001              | Yes                      | 39.8 (16.5, 95.5)                  |
| 40–59                               | 262 | 12                             | 198,136                                   | 42,708,670              | 357 (355, 358)                       | < 0.001              | Yes                      | 15.5 (8.8, 27.3)                   |
| 60–79                               | 122 | 4                              | 314,000                                   | 19,962,291              | 1,146 (1142, 1,151)                  | 0.02                 | Yes                      | 3.43 (1.29, 9.13)                  |
| ≥80                                 | 17  | 0                              | 107,685                                   | 2,999,997               | 1,961 (1,946, 1,977)                 | 0.50                 | No                       | undefined <sup>D</sup>             |
| <b>Gender</b>                       |     |                                |                                           |                         |                                      |                      |                          |                                    |
| Male                                | 330 | 6                              | 355,849                                   | 91,849,843              | 282 (281, 283)                       | < 0.001              | Yes                      | 6.66 (2.99, 14.82)                 |
| Female                              | 348 | 15                             | 310,045                                   | 96,548,117              | 234 (233, 235)                       | < 0.001              | Yes                      | 19.4 (11.7, 32.2)                  |
| <b>Period</b>                       |     |                                |                                           |                         |                                      |                      |                          |                                    |
| 1991–1999                           | 146 | 8                              | 167,371                                   | 55,627,198              | 274 (273, 275)                       | < 0.001              | Yes                      | 21.69 (10.84, 43.36)               |
| 2000–2009                           | 257 | 12                             | 229,847                                   | 68,095,442              | 248 (247, 249)                       | < 0.001              | Yes                      | 21.04 (11.95, 37.04)               |
| 2010–2018 <sup>E</sup>              | 275 | 1                              | 268,676                                   | 57,652,338              | 250 (249, 252)                       | 0.50                 | No                       | 1.94 (0.27, 13.76)                 |
| <b>Exposure to oral-ATO</b>         |     |                                |                                           |                         |                                      |                      |                          |                                    |
| No                                  | 369 | 8                              | 665,894                                   | 181,374,978             | 254 (253, 255)                       | < 0.001              | Yes                      | 8.5 (4.3, 17.1)                    |
| Yes                                 | 309 | 13                             | 665,894                                   | 181,374,978             | 254 (253, 257)                       | < 0.001              | Yes                      | 18.3 (10.6, 31.5)                  |
| <b>Time of exposure to oral-ATO</b> |     |                                |                                           |                         |                                      |                      |                          |                                    |
| Never                               | 369 | 8                              | 665,894                                   | 181,374,978             | 253.9 (253.1, 254.6)                 | < 0.001              | Yes                      | 8.5 (4.3, 17.1)                    |
| First-line                          | 212 | 7                              | 665,894                                   | 181,374,978             | 253.9 (253.1, 254.6)                 | < 0.001              | Yes                      | 14.6 (7.00, 30.7)                  |
| Second-line only                    | 78  | 5                              | 665,894                                   | 181,374,978             | 253.9 (253.1, 254.6)                 | < 0.001              | Yes                      | 26.2 (10.9, 62.9)                  |

APL: acute promyelocytic leukaemia; ATO: arsenic trioxide; No.: number; 2<sup>o</sup>: second; C.I.: confidence intervals; IR: incidence ratio; IRR: incidence rate ratio; A: The World WHO (2000-2025) standard population as the reference standard; B: IR was defined as number of events divided by the person-time at risk; C: Two sample Z test of proportions; D: values labelled as undefined, owing to the fact that IRR cannot be defined in different subgroups of age due to the small sample size; E: The last year where a second primary cancer occurred was in 2018. Comparison against the standard population was therefore until 2018. 2019-2021 was not included for second cancer comparison as the follow-up time for patients was too short to conclude if the incidence of second cancers was increased or decreased
